# Supplementary material for: Phenylhydrazone and Quinazoline Derivatives from the Cold-Seep-Derived Fungus Penicillium oxalicum
Source: MDPI journal article supplement (doi:10.3390/md19010009), 2020-12-28

# checkCIF/PLATON report

Structure factors have been supplied for datablock(s) yt\_jny1

THIS REPORT IS FOR GUIDANCE ONLY. IF USED AS PART OF A REVIEW PROCEDURE FOR PUBLICATION, IT SHOULD NOT REPLACE THE EXPERTISE OF AN EXPERIENCED CRYSTALLOGRAPHIC REFEREE.

No syntax errors found.      CIF dictionary      Interpreting this report

## Datablock: yt\_jny1

---

|                                                               |                     |                                  |
|---------------------------------------------------------------|---------------------|----------------------------------|
| Bond precision:                                               | C-C = 0.0038 A      | Wavelength=1.54178               |
| Cell:                                                         | a=14.7945(4)        | b=9.4752(2)      c=23.3965(6)    |
|                                                               | alpha=90            | beta=98.723(1)      gamma=90     |
| Temperature:                                                  | 100 K               |                                  |
|                                                               | Calculated          | Reported                         |
| Volume                                                        | 3241.81(14)         | 3241.80(14)                      |
| Space group                                                   | P 21                | P 1 21 1                         |
| Hall group                                                    | P 2yb               | P 2yb                            |
| Moiety formula                                                | 2(C35 H46 N2 O4), O | 2(C35 H46 N2 O4), H2 O           |
| Sum formula                                                   | C70 H92 N4 O9       | C70 H94 N4 O9                    |
| Mr                                                            | 1133.48             | 1135.49                          |
| Dx,g cm-3                                                     | 1.161               | 1.163                            |
| Z                                                             | 2                   | 2                                |
| Mu (mm-1)                                                     | 0.603               | 0.604                            |
| F000                                                          | 1224.0              | 1228.0                           |
| F000'                                                         | 1227.49             |                                  |
| h,k,lmax                                                      | 18,11,28            | 18,11,28                         |
| Nref                                                          | 12834[ 6827]        | 12787                            |
| Tmin,Tmax                                                     | 0.700,0.924         | 0.700,0.930                      |
| Tmin'                                                         | 0.624               |                                  |
| Correction method= # Reported T Limits: Tmin=0.700 Tmax=0.930 |                     |                                  |
| AbsCorr = MULTI-SCAN                                          |                     |                                  |
| Data completeness=                                            | 1.87/1.00           | Theta(max)= 72.330               |
| R(reflections)=                                               | 0.0427( 12556)      | wR2(reflections)= 0.1179( 12787) |
| S =                                                           | 1.032               | Npar= 773                        |

---

The following ALERTS were generated. Each ALERT has the format

**test-name\_ALERT\_alert-type\_alert-level.**

Click on the hyperlinks for more details of the test.

---

### 🔴 Alert level B

|                   |                                                 |              |  |
|-------------------|-------------------------------------------------|--------------|--|
| PLAT097_ALERT_2_B | Large Reported Max. (Positive) Residual Density | 0.98 eA-3    |  |
| PLAT420_ALERT_2_B | D-H Without Acceptor 08 --H91 .                 | Please Check |  |
| PLAT430_ALERT_2_B | Short Inter D...A Contact 07 ..09A .            | 2.82 Ang.    |  |
|                   | 1-x,-1/2+y,1-z =                                | 2_646 Check  |  |
| PLAT430_ALERT_2_B | Short Inter D...A Contact 07 ..09 .             | 2.84 Ang.    |  |
|                   | x,y,1+z =                                       | 1_556 Check  |  |

---

### 🟡 Alert level C

DIFMX02\_ALERT\_1\_C The maximum difference density is > 0.1\*ZMAX\*0.75  
The relevant atom site should be identified.

|                   |                                                  |              |
|-------------------|--------------------------------------------------|--------------|
| PLAT041_ALERT_1_C | Calc. and Reported SumFormula Strings Differ     | Please Check |
| PLAT043_ALERT_1_C | Calculated and Reported Mol. Weight Differ by .. | 2.01 Check   |
| PLAT094_ALERT_2_C | Ratio of Maximum / Minimum Residual Density .... | 3.05 Report  |
| PLAT911_ALERT_3_C | Missing FCF Refl Between Thmin & STh/L= 0.600    | 10 Report    |
| PLAT913_ALERT_3_C | Missing # of Very Strong Reflections in FCF .... | 9 Note       |
| PLAT918_ALERT_3_C | Reflection(s) with I(obs) much Smaller I(calc) . | 1 Check      |
| PLAT934_ALERT_3_C | Number of (Iobs-Icalc)/Sigma(W) > 10 Outliers .. | 1 Check      |
| PLAT975_ALERT_2_C | Check Calcd Resid. Dens. 1.02A From 09           | 1.02 eA-3    |

---

### 🟠 Alert level G

FORMU01\_ALERT\_2\_G There is a discrepancy between the atom counts in the  
\_chemical\_formula\_sum and the formula from the \_atom\_site\* data.  
Atom count from \_chemical\_formula\_sum: C70 H94 N4 O9  
Atom count from the \_atom\_site data: C70 H92 N4 O9

CELLZ01\_ALERT\_1\_G Difference between formula and atom\_site contents detected.  
CELLZ01\_ALERT\_1\_G WARNING: H atoms missing from atom site list. Is this intentional?  
From the CIF: \_cell\_formula\_units\_Z 2  
From the CIF: \_chemical\_formula\_sum C70 H94 N4 O9  
TEST: Compare cell contents of formula and atom\_site data

| atom | Z*formula | cif sites | diff |
|------|-----------|-----------|------|
| C    | 140.00    | 140.00    | 0.00 |
| H    | 188.00    | 184.00    | 4.00 |
| N    | 8.00      | 8.00      | 0.00 |
| O    | 18.00     | 18.00     | 0.00 |

|                   |                                                      |              |
|-------------------|------------------------------------------------------|--------------|
| PLAT007_ALERT_5_G | Number of Unrefined Donor-H Atoms .....              | 3 Report     |
| PLAT042_ALERT_1_G | Calc. and Reported MoietyFormula Strings Differ      | Please Check |
| PLAT063_ALERT_4_G | Crystal Size Possibly too Large for Beam Size ..     | 0.70 mm      |
| PLAT066_ALERT_1_G | Predicted and Reported Tmin&Tmax Range Identical     | ? Check      |
| PLAT068_ALERT_1_G | Reported F000 Differs from Calcd (or Missing)...     | Please Check |
| PLAT302_ALERT_4_G | Anion/Solvent/Minor-Residue Disorder (Resd 3 )       | 100% Note    |
| PLAT302_ALERT_4_G | Anion/Solvent/Minor-Residue Disorder (Resd 4 )       | 100% Note    |
| PLAT304_ALERT_4_G | Non-Integer Number of Atoms in ..... (Resd 3 )       | 0.82 Check   |
| PLAT304_ALERT_4_G | Non-Integer Number of Atoms in ..... (Resd 4 )       | 0.18 Check   |
| PLAT311_ALERT_2_G | Isolated Disordered Oxygen Atom (No H's ?) .....     | 09 Check     |
| PLAT311_ALERT_2_G | Isolated Disordered Oxygen Atom (No H's ?) .....     | 09A Check    |
| PLAT790_ALERT_4_G | Centre of Gravity not Within Unit Cell: Resd. #<br>O | 3 Note       |
| PLAT791_ALERT_4_G | Model has Chirality at C3 (Sohnke SpGr)              | R Verify     |
| PLAT791_ALERT_4_G | Model has Chirality at C6 (Sohnke SpGr)              | R Verify     |
| PLAT791_ALERT_4_G | Model has Chirality at C7 (Sohnke SpGr)              | R Verify     |
| PLAT791_ALERT_4_G | Model has Chirality at C8 (Sohnke SpGr)              | R Verify     |
| PLAT791_ALERT_4_G | Model has Chirality at C9 (Sohnke SpGr)              | R Verify     |
| PLAT791_ALERT_4_G | Model has Chirality at C10 (Sohnke SpGr)             | R Verify     |
| PLAT791_ALERT_4_G | Model has Chirality at C11 (Sohnke SpGr)             | R Verify     |
| PLAT791_ALERT_4_G | Model has Chirality at C38 (Sohnke SpGr)             | R Verify     |
| PLAT791_ALERT_4_G | Model has Chirality at C41 (Sohnke SpGr)             | R Verify     |
| PLAT791_ALERT_4_G | Model has Chirality at C42 (Sohnke SpGr)             | R Verify     |

|                                                                    |               |             |
|--------------------------------------------------------------------|---------------|-------------|
| PLAT791_ALERT_4_G Model has Chirality at C43                       | (Sohnke SpGr) | R Verify    |
| PLAT791_ALERT_4_G Model has Chirality at C44                       | (Sohnke SpGr) | R Verify    |
| PLAT791_ALERT_4_G Model has Chirality at C45                       | (Sohnke SpGr) | S Verify    |
| PLAT791_ALERT_4_G Model has Chirality at C70                       | (Sohnke SpGr) | R Verify    |
| PLAT883_ALERT_1_G No Info/Value for _atom_sites_solution_primary . |               | Please Do ! |
| PLAT910_ALERT_3_G Missing # of FCF Reflection(s) Below Theta(Min). |               | 2 Note      |
| PLAT912_ALERT_4_G Missing # of FCF Reflections Above STh/L= 0.600  |               | 3 Note      |
| PLAT978_ALERT_2_G Number C-C Bonds with Positive Residual Density. |               | 12 Info     |
| PLAT992_ALERT_5_G Repd & Actual _reflns_number_gt Values Differ by |               | 2 Check     |

---

0 **ALERT level A** = Most likely a serious problem - resolve or explain  
 4 **ALERT level B** = A potentially serious problem, consider carefully  
 9 **ALERT level C** = Check. Ensure it is not caused by an omission or oversight  
 34 **ALERT level G** = General information/check it is not something unexpected

9 ALERT type 1 CIF construction/syntax error, inconsistent or missing data  
 10 ALERT type 2 Indicator that the structure model may be wrong or deficient  
 5 ALERT type 3 Indicator that the structure quality may be low  
 21 ALERT type 4 Improvement, methodology, query or suggestion  
 2 ALERT type 5 Informative message, check

---

## Validation response form

Please find below a validation response form (VRF) that can be filled in and pasted into your CIF.

```
# start Validation Reply Form
_vrf_DIFMX02_yt_jny1
;
PROBLEM: The maximum difference density is > 0.1*ZMAX*0.75
RESPONSE: ...
;
_vrf_PLAT041_yt_jny1
;
PROBLEM: Calc. and Reported SumFormula      Strings      Differ      Please Check
RESPONSE: ...
;
_vrf_PLAT043_yt_jny1
;
PROBLEM: Calculated and Reported Mol. Weight Differ by ..      2.01 Check
RESPONSE: ...
;
_vrf_PLAT094_yt_jny1
;
PROBLEM: Ratio of Maximum / Minimum Residual Density ....      3.05 Report
RESPONSE: ...
;
_vrf_PLAT911_yt_jny1
;
PROBLEM: Missing FCF Refl Between Thmin & STh/L=      0.600      10 Report
RESPONSE: ...
;
_vrf_PLAT913_yt_jny1
;
PROBLEM: Missing # of Very Strong Reflections in FCF ....      9 Note
RESPONSE: ...
;
_vrf_PLAT918_yt_jny1
;
PROBLEM: Reflection(s) with I(obs) much Smaller I(calc) .      1 Check
```

```

RESPONSE: ...
;
_vrf_PLAT934_yt_jny1
;
PROBLEM: Number of (Iobs-Icalc)/Sigma(W) > 10 Outliers ..          1 Check
RESPONSE: ...
;
_vrf_PLAT975_yt_jny1
;
PROBLEM: Check Calcd Resid. Dens.  1.02A    From O9                1.02 eA-3
RESPONSE: ...
;
# end Validation Reply Form

```

---

It is advisable to attempt to resolve as many as possible of the alerts in all categories. Often the minor alerts point to easily fixed oversights, errors and omissions in your CIF or refinement strategy, so attention to these fine details can be worthwhile. In order to resolve some of the more serious problems it may be necessary to carry out additional measurements or structure refinements. However, the purpose of your study may justify the reported deviations and the more serious of these should normally be commented upon in the discussion or experimental section of a paper or in the "special\_details" fields of the CIF. checkCIF was carefully designed to identify outliers and unusual parameters, but every test has its limitations and alerts that are not important in a particular case may appear. Conversely, the absence of alerts does not guarantee there are no aspects of the results needing attention. It is up to the individual to critically assess their own results and, if necessary, seek expert advice.

### **Publication of your CIF in IUCr journals**

A basic structural check has been run on your CIF. These basic checks will be run on all CIFs submitted for publication in IUCr journals (*Acta Crystallographica*, *Journal of Applied Crystallography*, *Journal of Synchrotron Radiation*); however, if you intend to submit to *Acta Crystallographica Section C* or *E* or *IUCrData*, you should make sure that full publication checks are run on the final version of your CIF prior to submission.

### **Publication of your CIF in other journals**

Please refer to the *Notes for Authors* of the relevant journal for any special instructions relating to CIF submission.

---

**PLATON version of 10/08/2020; check.def file version of 06/08/2020**

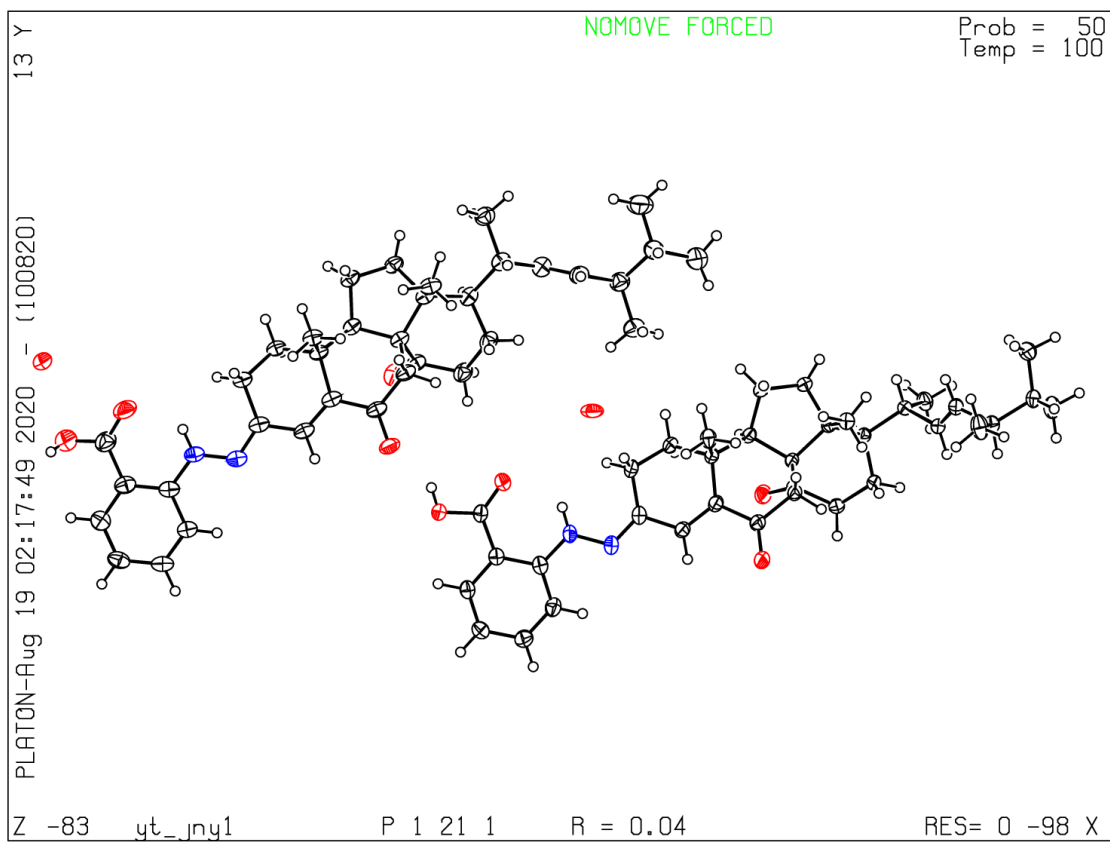

Supplement: s1 [file s1]
